# Supplementary material for: Confident phylogenetic identification of uncultured prokaryotes through long read amplicon sequencing of the 16S‐ITS‐23S rRNA operon
Source: PubMed Central journal article supplement — Environ Microbiol. 2019 May 7;21(7):2485–98. doi: 10.1111/1462-2920.14636 (PMC6849856; doi:10.1111/1462-2920.14636), 2019-05-07
Supplement: EMI-21-2485-s001.pdf [file EMI-21-2485-s001.pdf]

## Supplementary Information

### Supplementary Discussions

#### Relative abundance estimates in mock community

To test whether our method was able to estimate relative abundances of taxa accurately, we designed our mock community such that each genome was represented by an equal number of 16S-ITS-23S loci (Table S2). The expectation was that all taxa would be represented with a similar amount of qtrim ccs reads. However, this was not the case: we could not detect 9 out of 38 taxa (or 50 out of 123 loci), and among detected taxa there was no equal representation (Fig. S9). This is not counting the 4 taxa which were found to contaminate the mock community (see Experimental Procedures). The contamination was only slight: only 5 qtrim ccs reads mapped to 1 locus each of *M. wisconsensis* and *V. parvula*. Primer bias, a phenomenon in which the degree of primer-template matching can lead to preferential amplification of some taxa while possibly ignoring others, does not seem to explain our observation. All 123 loci of both detected and undetected taxa matched the primers perfectly. The exceptions were the loci of *N. aromaticivorans* and *P. saltans* (not detected) and *T. roseus* (detected), which exhibit a single A to G mismatch in the reverse primer. Locus length and locus GC-content do not seem to explain the observation either. We could not find a correlation between either and observed qtrim ccs read counts (Fig. S10).

# PacBio 16S-ITS-23S CCS read curation pipeline

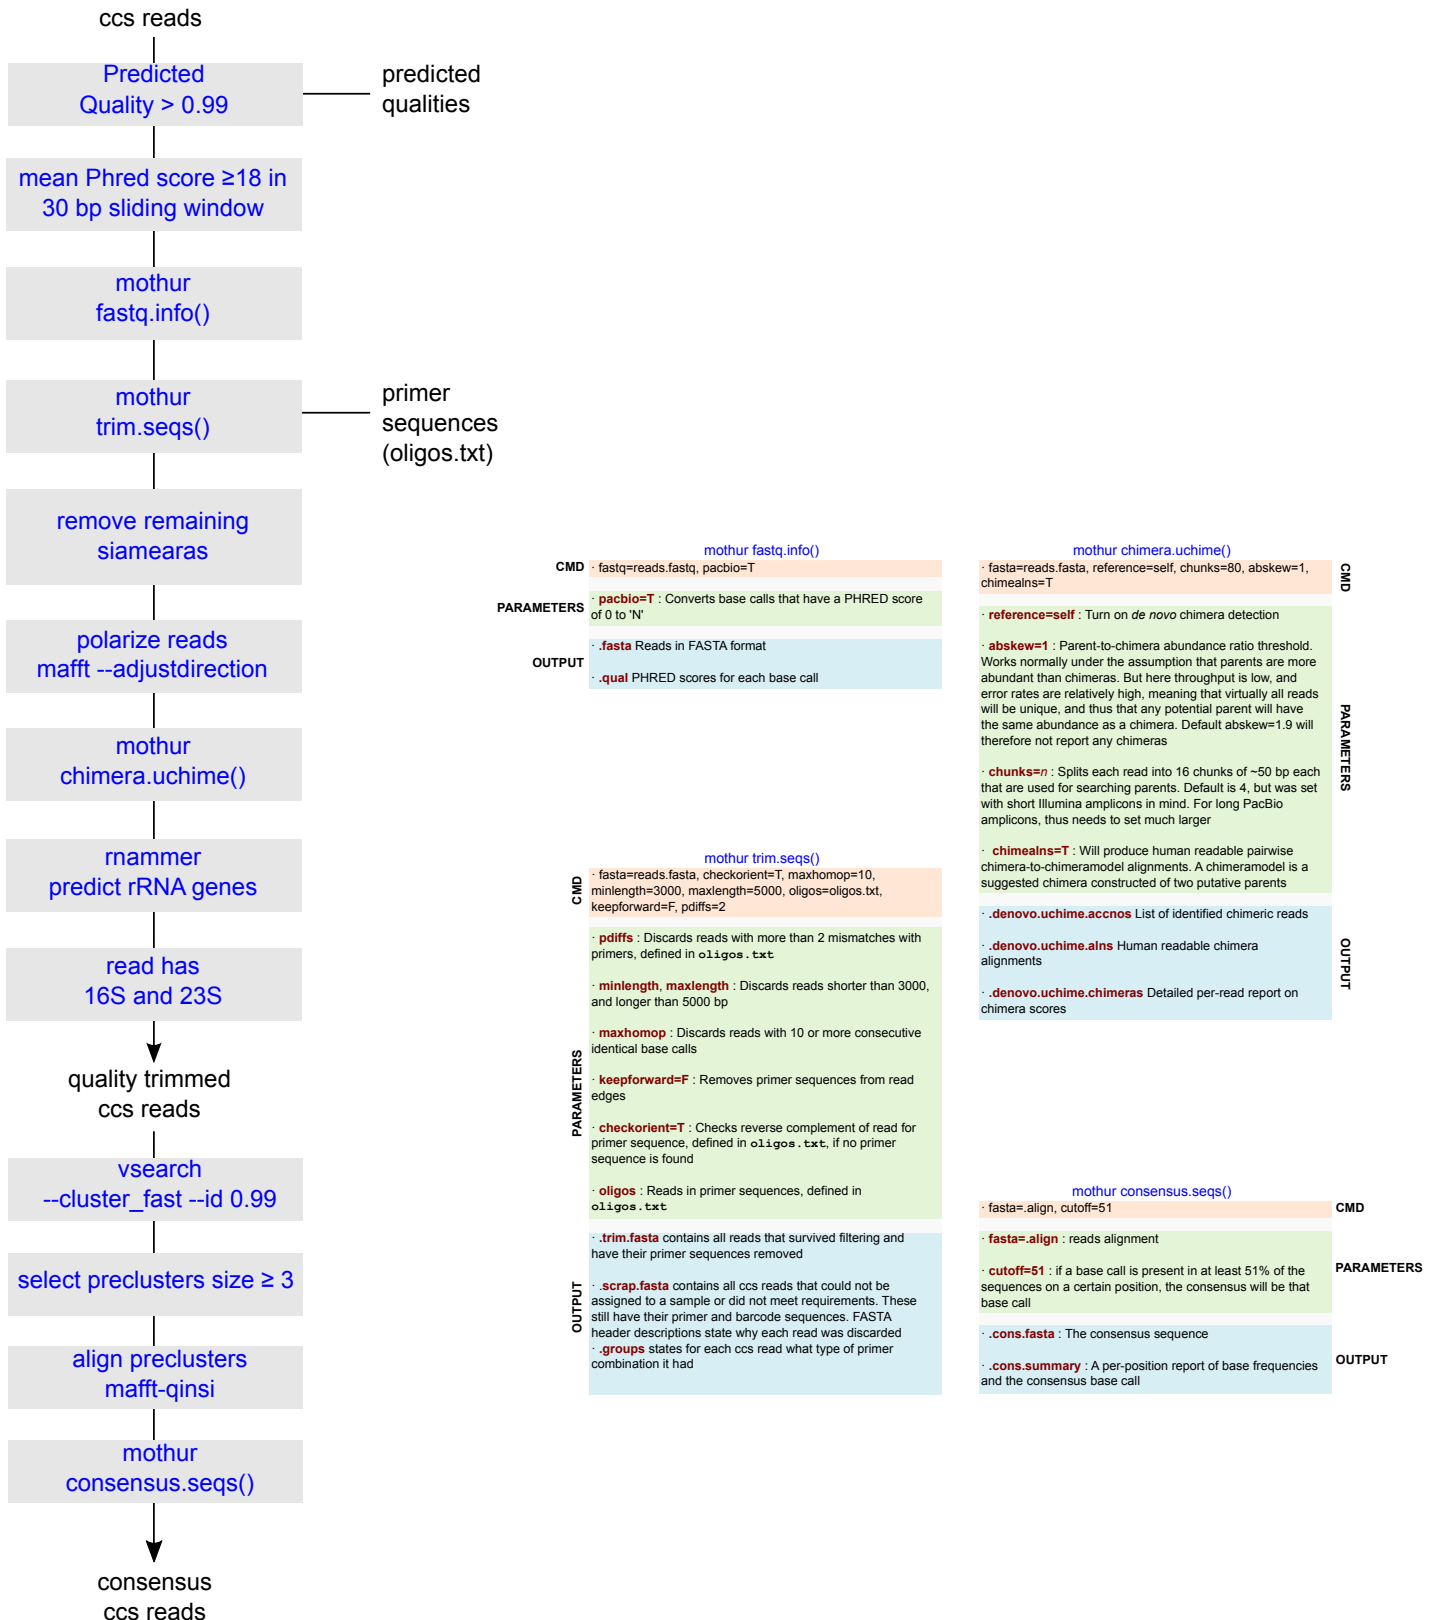

**Fig. S1 |** Read curation pipeline and mothur function settings. See 'Read curation pipeline' in Methods for a detailed description of the pipeline. See [mothur.org/wiki/Sequence\\_processing](http://mothur.org/wiki/Sequence_processing) for more detailed descriptions and explanations of the mothur functions.

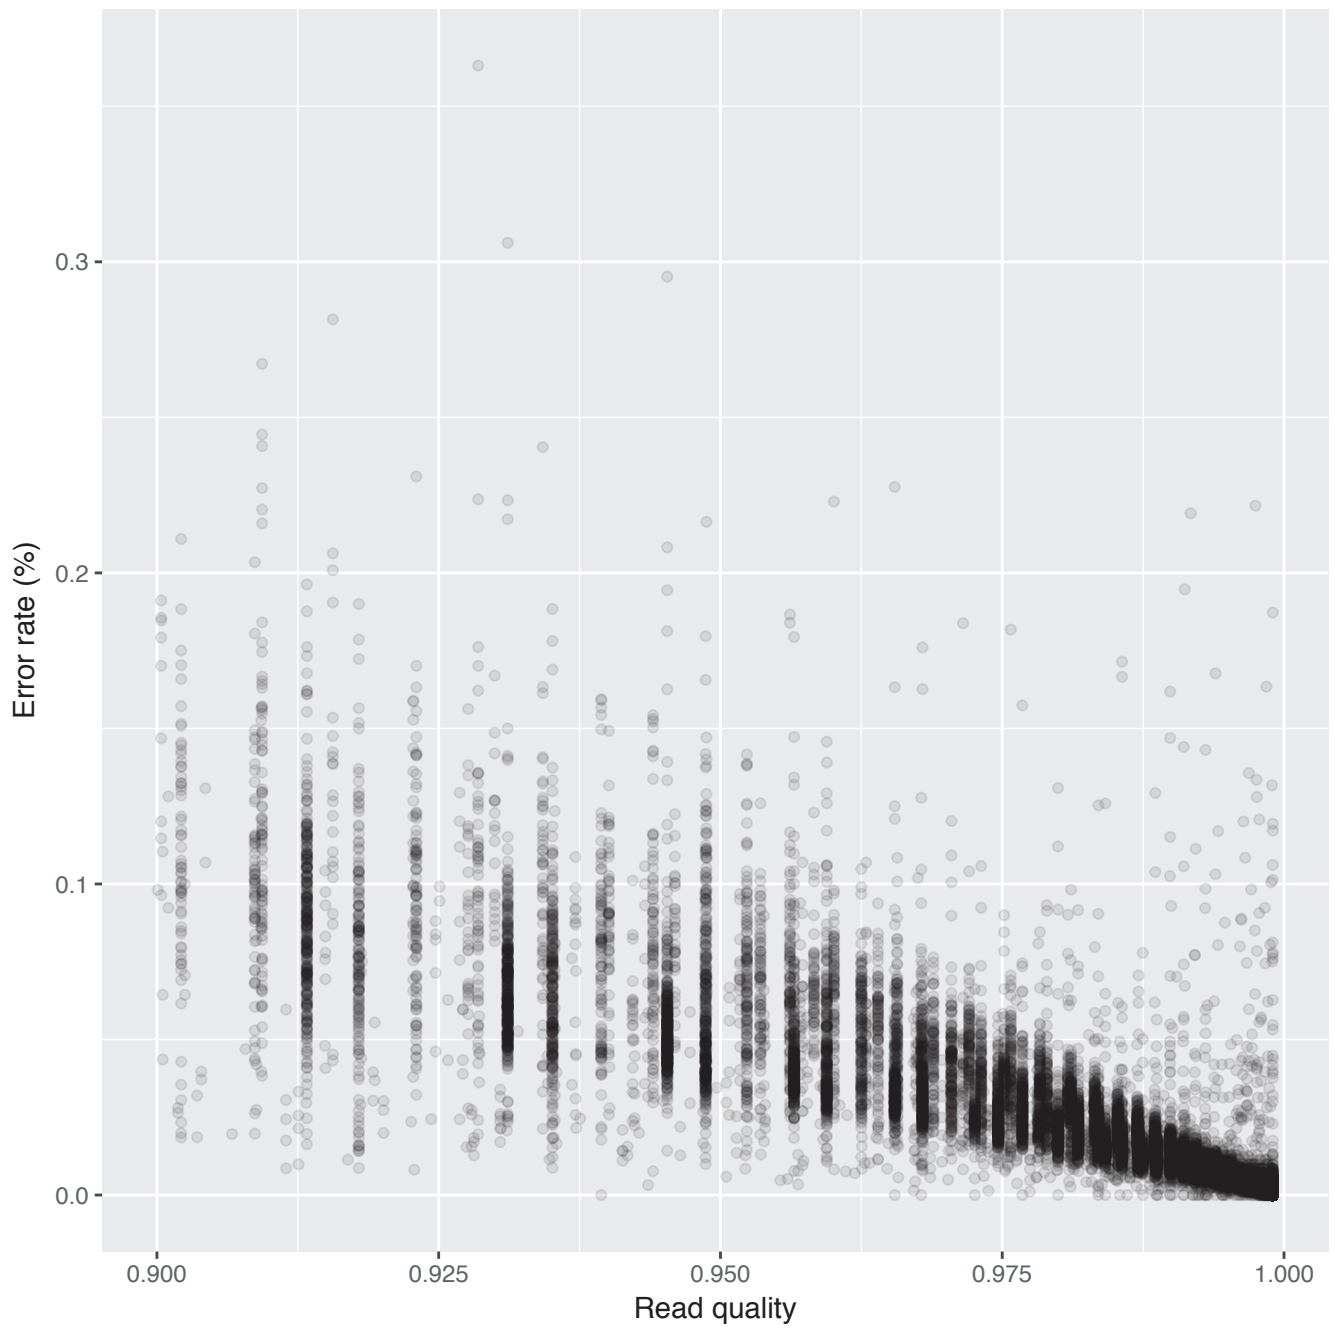

**Fig. S2** | Relationship between ccs read quality and observed error rate



## Simaera formation

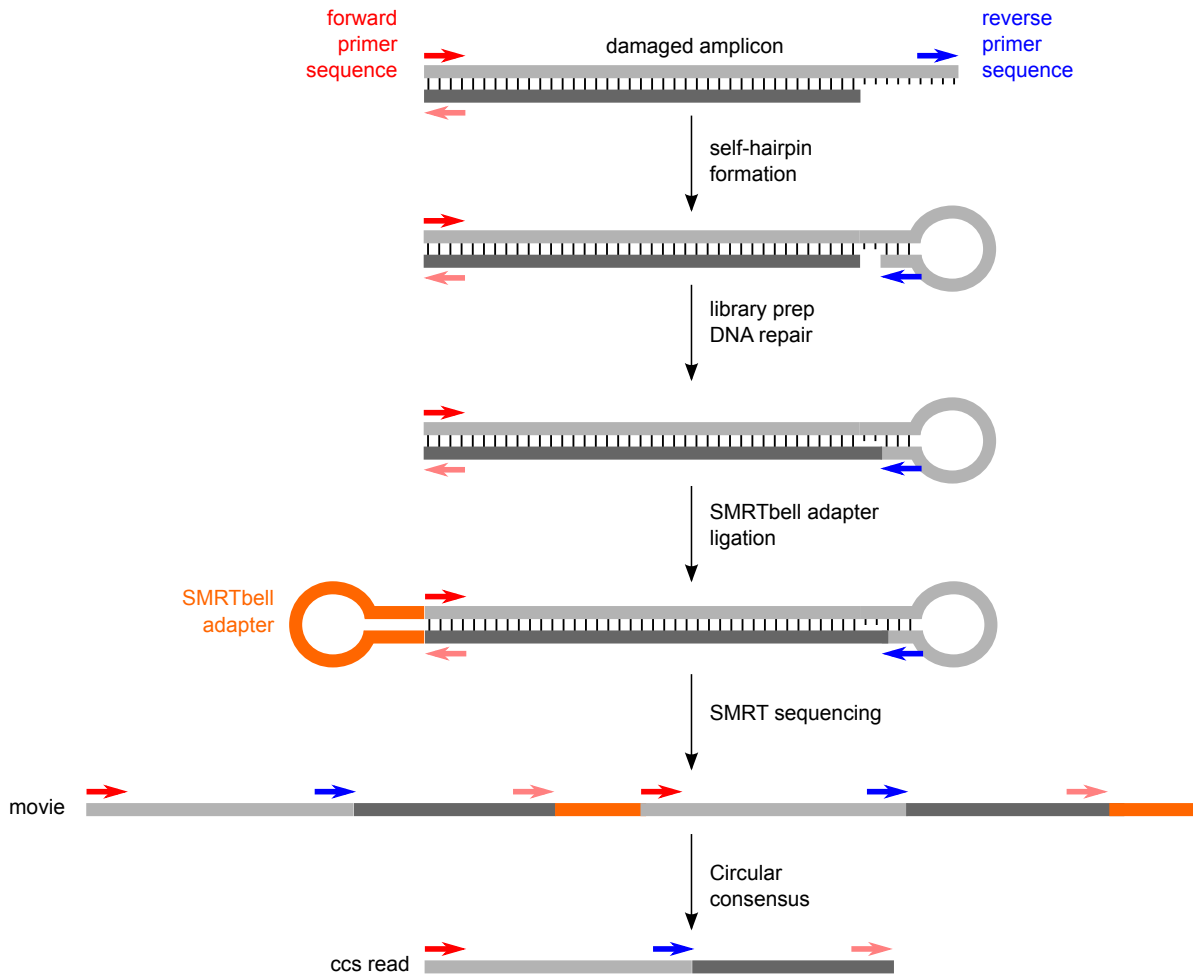

Example of a full length siamaeric read

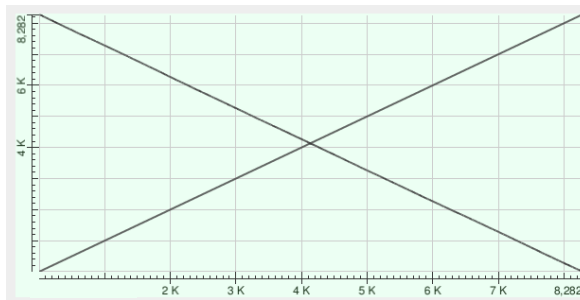

Example of a partial siamaeric read

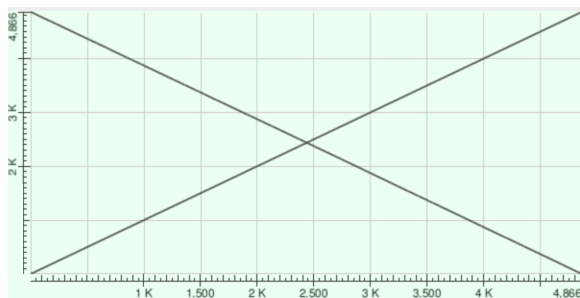

**Fig. S4** | Hypothetical mechanism leading to a siamaeric read. In the bottom two examples of siamaeric reads, recognized by BLASTN dot plots

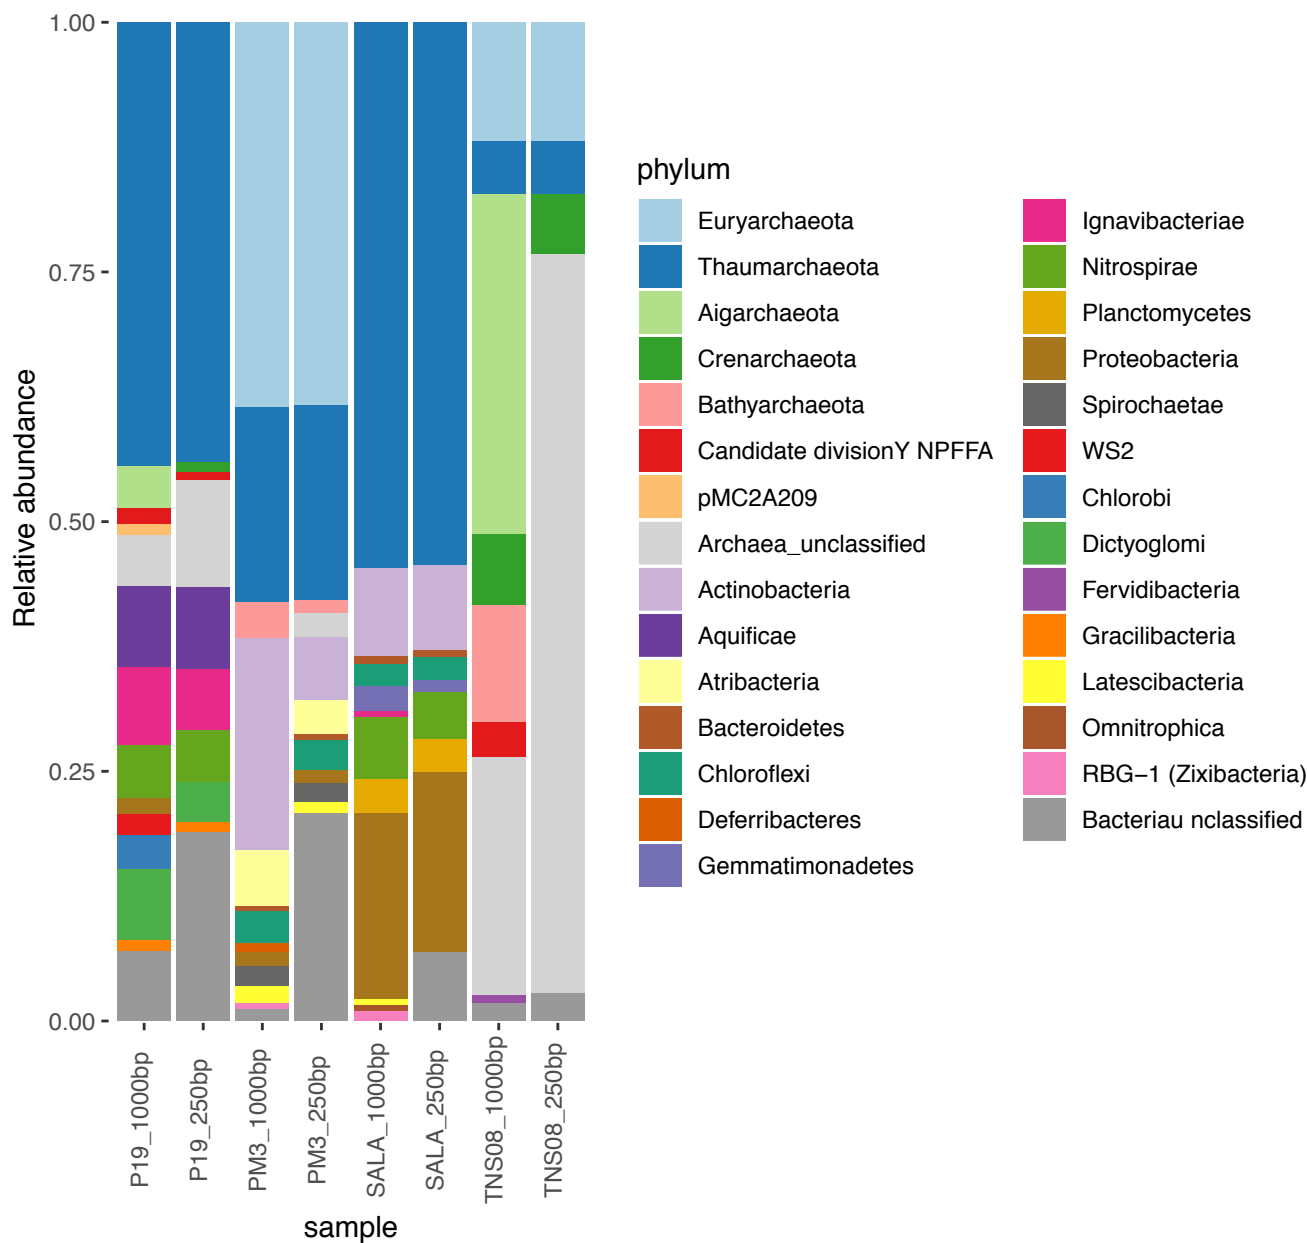

**Fig. S5** | Bar charts reflecting estimated relative abundances of bacterial and archaeal phyla with  $\geq 0.5\%$  abundance. \*\_1000bp: relative abundances estimated from  $\sim 1000$  bp 16S rRNA gene sequence. \*\_250bp: relative abundances estimated from 250 bp 16S rRNA gene sequence fragments spanning the V4 region.

Archaea  
16S\_250bp

IQ-TREE  
GTR+I+R8 (ModelFinder)  
Non-parametric bootstraps

Archaea  
16S

IQ-TREE  
GTR+I+R8 (ModelFinder)  
Non-parametric bootstraps

Archaea  
16S+23S

IQ-TREE  
GTR+I+R8 (ModelFinder)  
Non-parametric bootstraps

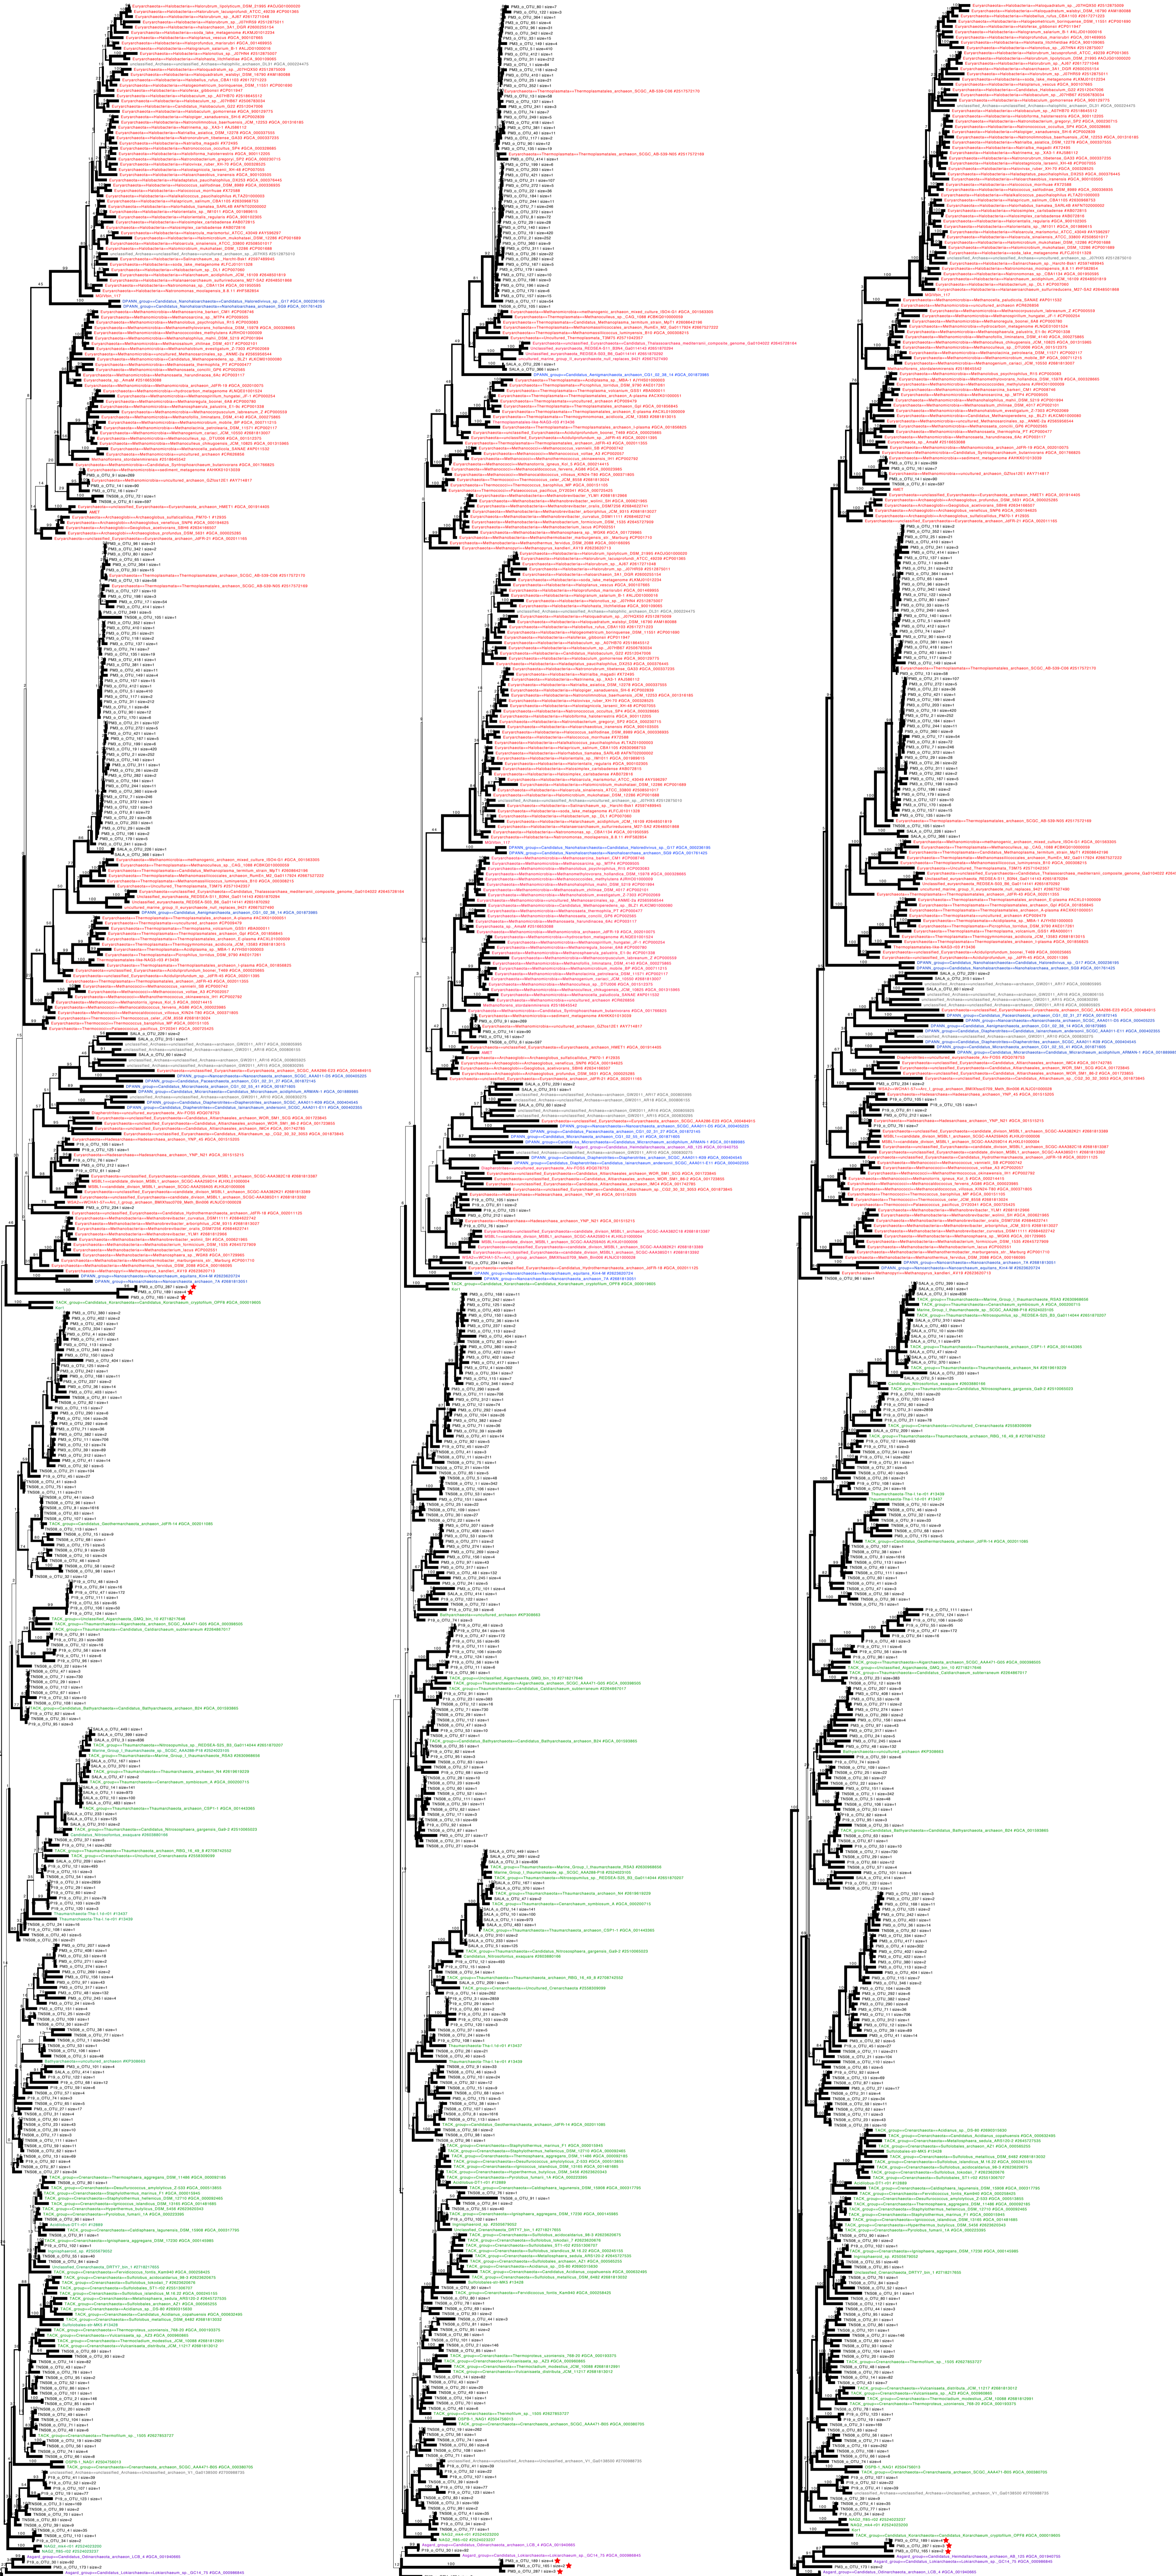

Fig. S6 Unrooted maximum likelihood phylogenies inferred from archaeal '16s\_250bp', '16S' and '16S+23S' datasets. 'size=' indicates the number of trim ccs reads in the respective 97% OTUs. Taxa of major taxonomic groups are colored. Branch values indicate non-parametric bootstrap support. ★ Indicates taxa that are discussed in the main text.

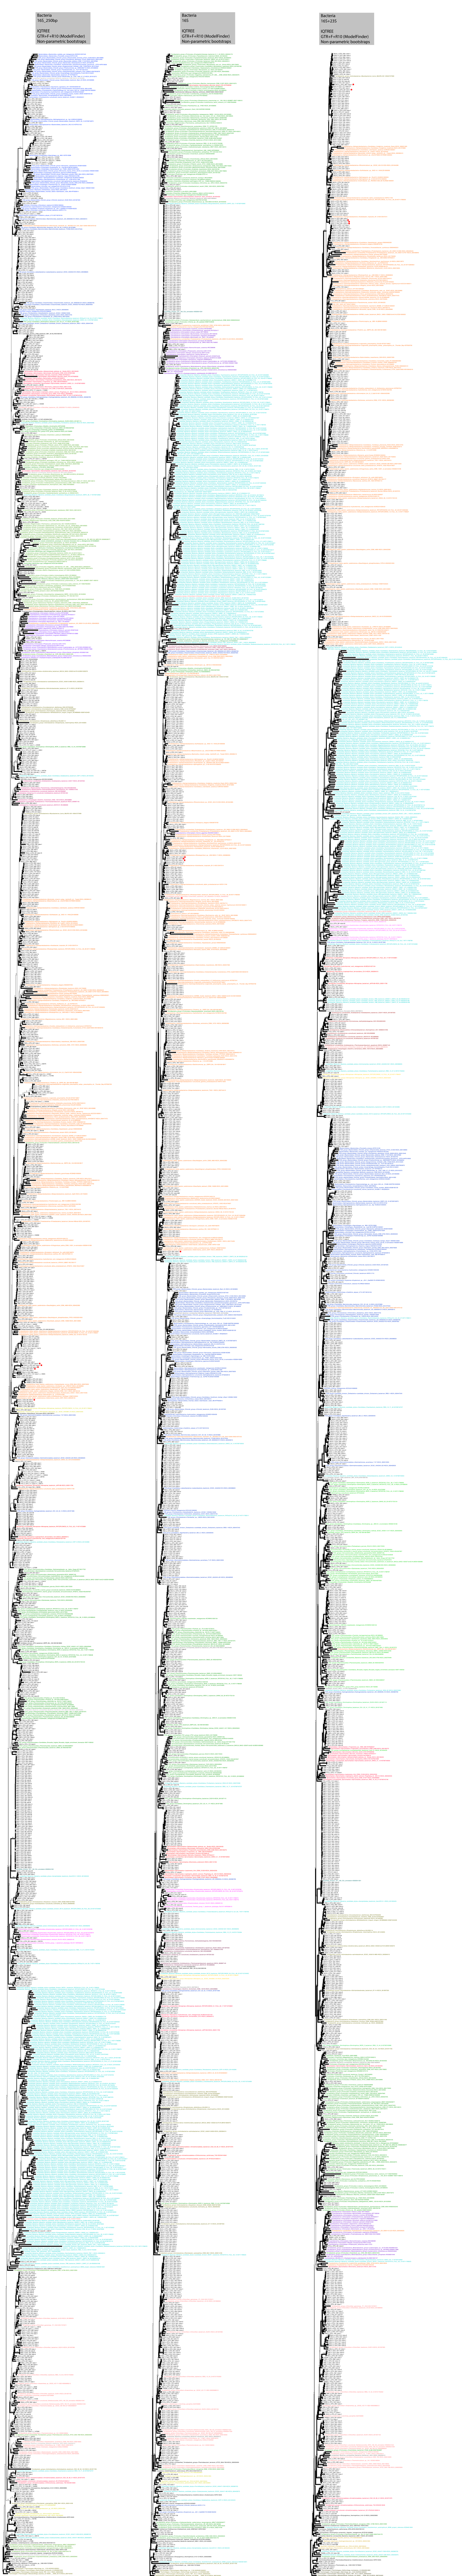

Fig. S7 | Unrooted maximum likelihood phylogenies inferred from bacterial '16S\_250bp', '16S' and '16S+23S' datasets. 'size=' indicates the number of qtrim ccs reads in the respective 97% OTUs. Taxa of major taxonomic groups are colored. Branch values indicate non-parametric bootstrap support. ★ Indicates taxa discussed in the main text



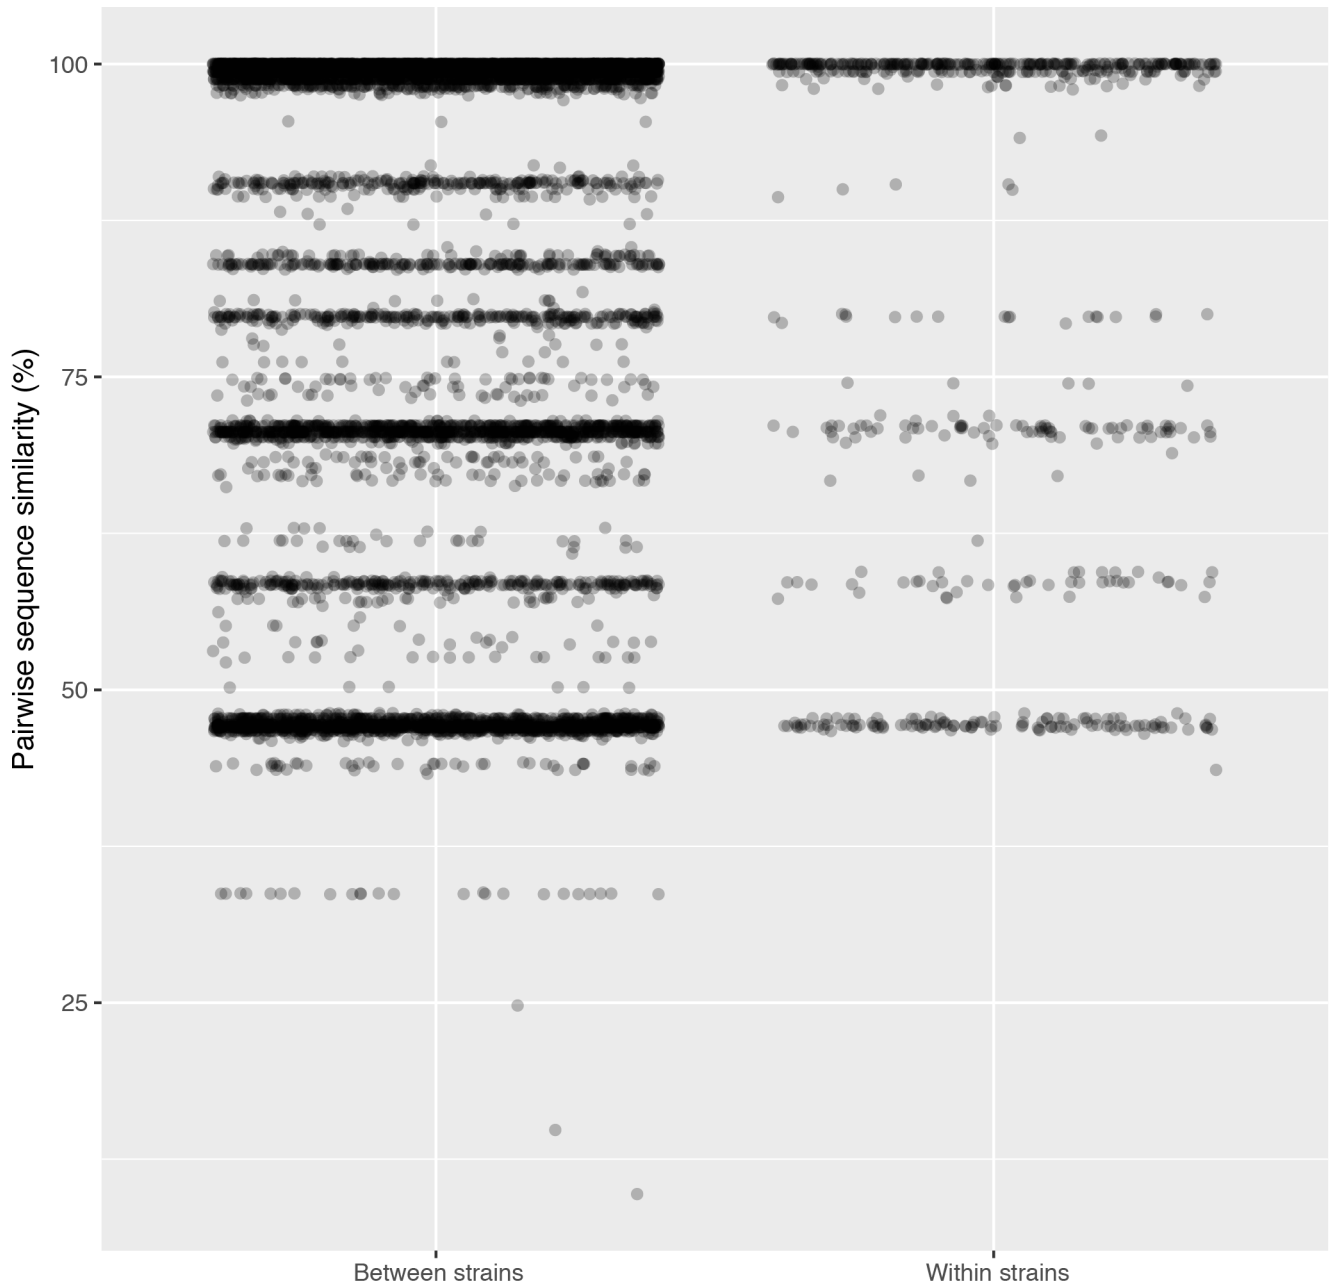

**Fig. S8** | Sequence similarities of internal transcribed spacer (ITS) copies either between different strains of the same species (left) or between different ITS copies within the same strain (right). Bacterial and archaeal species used are those that are present in the mock community and their close relatives with complete genomes available.

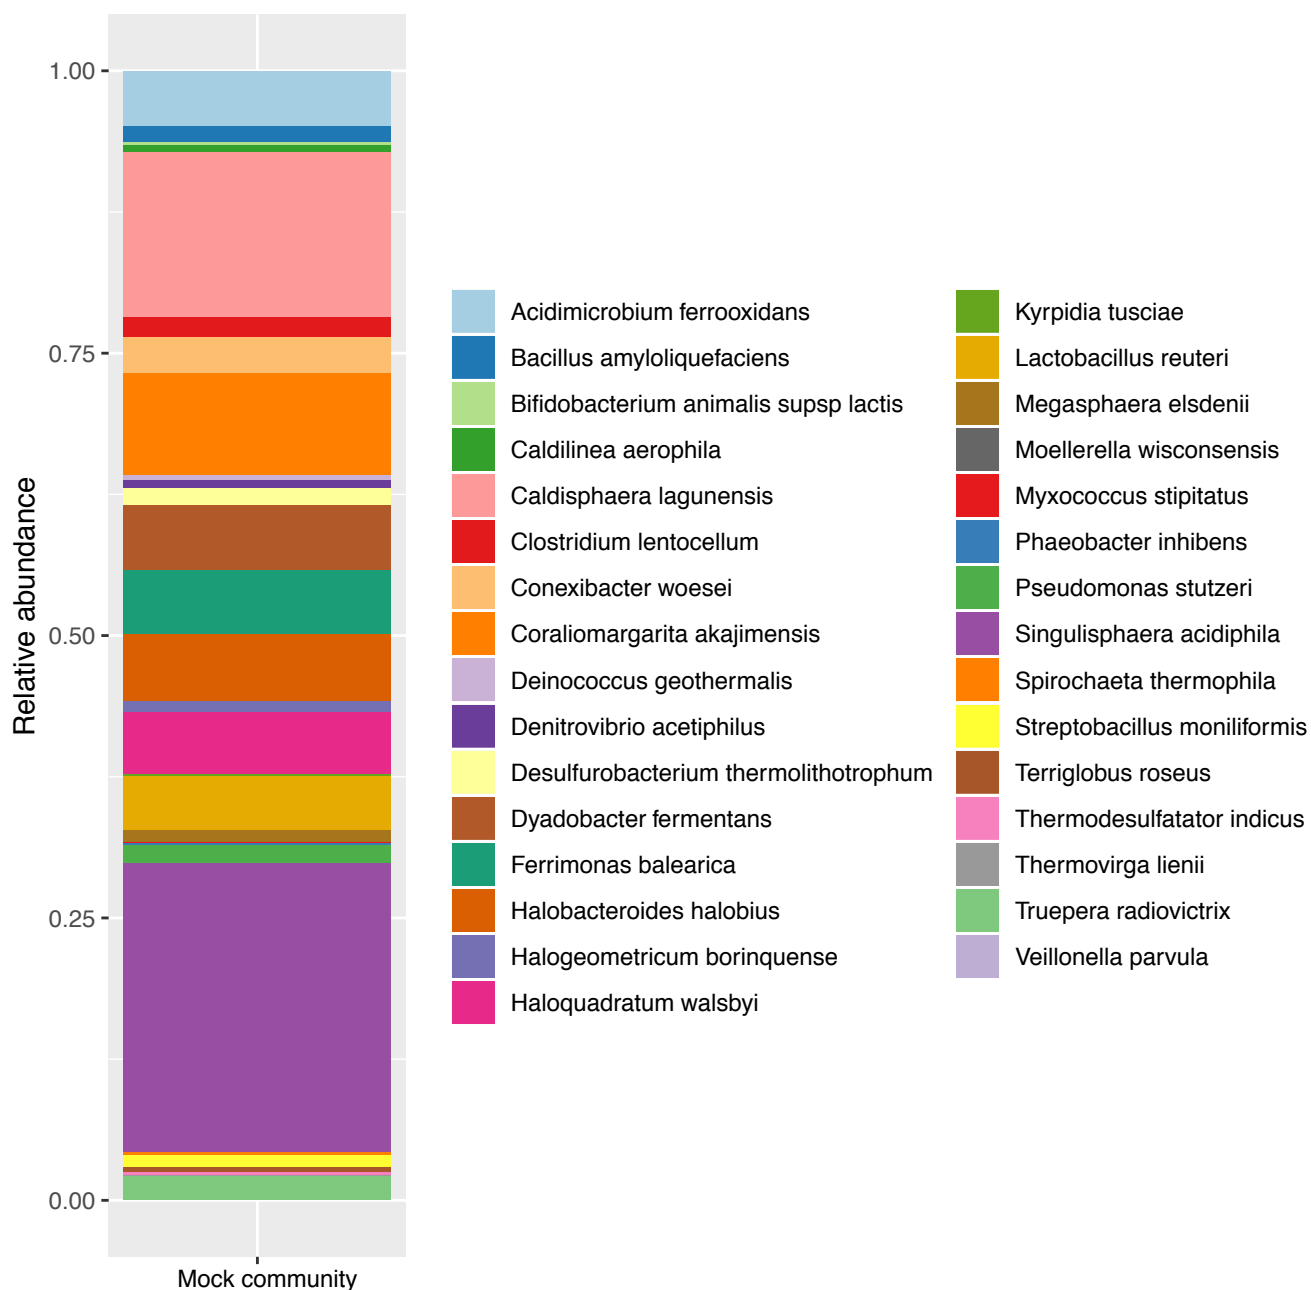

**Fig. S9** | Bar chart reflecting the estimated relative abundances of genomes that are part of the mock community.

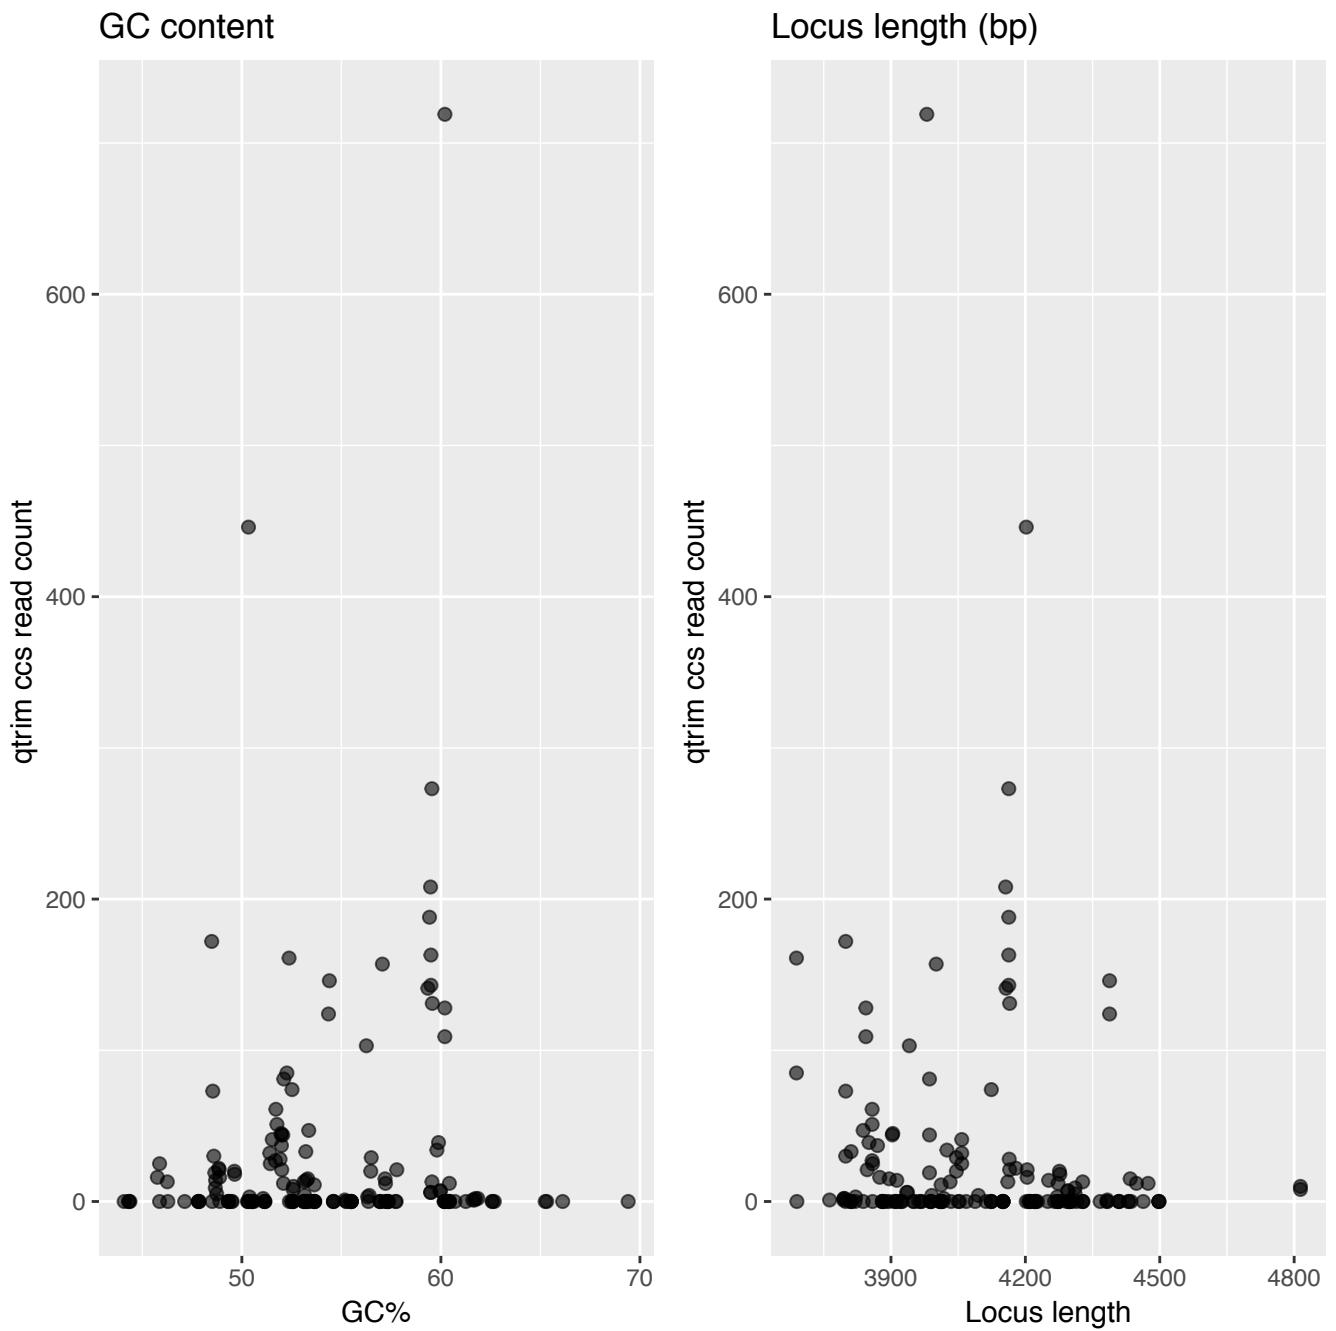

**Fig. S10** | Relationships between the %GC (left) or length (right) of the 16S-ITS-23S loci of the mock community genomes and their quality-trimmed ccs read counts.

**Table S1.** 16S-ITS-23S loci in Archaea and Bacteria

| <b># 16S-ITS-23S loci</b> | <b>Archaea</b> | <b>Bacteria</b> |
|---------------------------|----------------|-----------------|
| 0                         | 96             | 4 106           |
| 1                         | 176            | 4 692           |
| 2                         | 50             | 1 135           |
| 3                         | 36             | 719             |
| 4                         | 5              | 546             |
| 5                         | 1              | 321             |
| >5                        | 0              | 1 076           |
| Total                     | 364            | 12 595          |
| Fraction $\geq 1$         | 0,74           | 0,67            |

**Table S2.** Composition of the mock community

| Taxon                                  | DSM no. | 16S-ITS-23S<br>loci | molecular<br>genome length (bp) | measured<br>genome weight (Da or ng/nmol) | measured<br>concentration (ng/μl) | measured<br>concentration (amol/μl) | "operonmol"/μl | nl/"operonmol" | Volume %   | μl to<br>pipette |
|----------------------------------------|---------|---------------------|---------------------------------|-------------------------------------------|-----------------------------------|-------------------------------------|----------------|----------------|------------|------------------|
| Methanocaldococcus jannaschii          | 2661    | 2                   | 1664970                         | 1082230500                                | 23,4                              | 21,6                                | 43,2           | 0,023          | 1,1        | 1,6              |
| Archaeoglobus fulgidus                 | 4304    | 1                   | 2178400                         | 1415960000                                | 24,6                              | 17,4                                | 17,4           | 0,058          | 2,7        | 4,0              |
| Pyrococcus furiosus                    | 3638    | 1                   | 1908256                         | 1240366400                                | 8,1                               | 6,5                                 | 6,5            | 0,154          | 7,1        | 10,6             |
| Haloquadratum walsbyi                  | 16790   | 2                   | 3132494                         | 2036121100                                | 22,1                              | 10,9                                | 21,7           | 0,046          | 2,1        | 3,2              |
| Hyperthermus butylicus                 | 5456    | 1                   | 1667163                         | 1083655950                                | 28,0                              | 25,8                                | 25,8           | 0,039          | 1,8        | 2,7              |
| Halogeometricum borinquense            | 11551   | 2                   | 2820544                         | 1833353600                                | 24,2                              | 13,2                                | 26,4           | 0,038          | 1,7        | 2,6              |
| Caldisphaera lagunensis                | 15908   | 1                   | 1546846                         | 1005449900                                | 14,2                              | 14,1                                | 14,1           | 0,071          | 3,3        | 4,9              |
| Novosphaerobium aromaticivorans        | 12444   | 3                   | 3561584                         | 2315029600                                | 19,4                              | 8,4                                 | 25,1           | 0,040          | 1,8        | 2,8              |
| Deinococcus geothermalis               | 11300   | 1                   | 574127                          | 373182550                                 | 5,5                               | 14,6                                | 14,6           | 0,068          | 3,2        | 4,7              |
| Lactobacillus reuteri                  | 20016   | 6                   | 1999618                         | 1299751700                                | 26,3                              | 20,2                                | 121,2          | 0,008          | 0,4        | 0,6              |
| Dictyoglomus turgidum                  | 6724    | 2                   | 1855560                         | 1206114000                                | 18,6                              | 15,5                                | 30,9           | 0,032          | 1,5        | 2,2              |
| Bifidobacterium animalis subsp. lactis | 10140   | 4                   | 1938483                         | 1260013950                                | 10,0                              | 7,9                                 | 31,6           | 0,032          | 1,5        | 2,2              |
| Dyadobacter fermentans                 | 18053   | 4                   | 6967790                         | 4529063500                                | 25,6                              | 5,6                                 | 22,6           | 0,044          | 2,0        | 3,1              |
| Acidimicrobium ferrooxidans            | 10331   | 2                   | 2158157                         | 1402802050                                | 21,9                              | 15,6                                | 31,2           | 0,032          | 1,5        | 2,2              |
| Streptobacillus moniliformis           | 12112   | 5                   | 1662578                         | 1080675700                                | 21,1                              | 19,6                                | 97,8           | 0,010          | 0,5        | 0,7              |
| Conexibacter woesei                    | 14684   | 1                   | 6359369                         | 4133589850                                | 23,0                              | 5,6                                 | 5,6            | 0,180          | 8,3        | 12,4             |
| Denitrovibrio acetiphilus              | 12809   | 2                   | 3222077                         | 2094350050                                | 21,1                              | 10,1                                | 20,1           | 0,050          | 2,3        | 3,4              |
| Coraliomargarita akajimensis           | 45221   | 2                   | 3750771                         | 2438001150                                | 21,6                              | 8,9                                 | 17,7           | 0,056          | 2,6        | 3,9              |
| Kyrpidia tusciae                       | 2912    | 5                   | 3384766                         | 2200097900                                | 20,1                              | 9,2                                 | 45,8           | 0,022          | 1,0        | 1,5              |
| Truepera radiovictrix                  | 17093   | 1                   | 3260398                         | 2119258700                                | 21,2                              | 10,0                                | 10,0           | 0,100          | 4,6        | 6,9              |
| Ferrimonas balearica                   | 9799    | 7                   | 4279159                         | 2781453350                                | 25,6                              | 9,2                                 | 64,3           | 0,016          | 0,7        | 1,1              |
| Bacillus amyloliquefaciens             | 7       | 10                  | 3980199                         | 2587129350                                | 11,5                              | 4,4                                 | 44,4           | 0,023          | 1,0        | 1,6              |
| Pedobacter saltans                     | 12145   | 4                   | 4635236                         | 3012903400                                | 6,7                               | 2,2                                 | 8,9            | 0,113          | 5,2        | 7,8              |
| Desulfurobacterium thermolithotrophum  | 11699   | 2                   | 1541968                         | 1002279200                                | 20,6                              | 20,5                                | 41,1           | 0,024          | 1,1        | 1,7              |
| Clostridium lentocellum                | 5427    | 8                   | 4714237                         | 3064254050                                | 21,1                              | 6,9                                 | 55,0           | 0,018          | 0,8        | 1,3              |
| Thermodesulfatator indicus             | 15286   | 2                   | 2322224                         | 1509445600                                | 21,7                              | 14,4                                | 28,7           | 0,035          | 1,6        | 2,4              |
| Thermotoga thermarum                   | 5069    | 1                   | 2039943                         | 1325962950                                | 9,4                               | 7,1                                 | 7,1            | 0,141          | 6,5        | 9,8              |
| Megasphaera elsdenii                   | 20460   | 7                   | 2474718                         | 1608566700                                | 24,4                              | 15,2                                | 106,1          | 0,009          | 0,4        | 0,7              |
| Thermovirga lienii                     | 17291   | 3                   | 1967774                         | 1279053100                                | 22,0                              | 17,2                                | 51,7           | 0,019          | 0,9        | 1,3              |
| Caldilinea aerophila                   | 14535   | 2                   | 5144873                         | 3344167450                                | 22,1                              | 6,6                                 | 13,2           | 0,076          | 3,5        | 5,2              |
| Pseudomonas stutzeri                   | 4166    | 4                   | 4689946                         | 3048464900                                | 13,5                              | 4,4                                 | 17,7           | 0,056          | 2,6        | 3,9              |
| Spirochaeta thermophila                | 6578    | 2                   | 2560222                         | 1664144300                                | 12,3                              | 7,4                                 | 14,8           | 0,068          | 3,1        | 4,7              |
| Terriglobus roseus                     | 18391   | 2                   | 5227858                         | 3398107700                                | 23,4                              | 6,9                                 | 13,8           | 0,073          | 3,3        | 5,0              |
| Phaeobacter inhibens                   | 17395   | 4                   | 3821831                         | 2484190150                                | 18,9                              | 7,6                                 | 30,5           | 0,033          | 1,5        | 2,3              |
| Sinqualisphaera acidiphila             | 18658   | 8                   | 9629675                         | 6259288750                                | 22,8                              | 3,6                                 | 29,1           | 0,034          | 1,6        | 2,4              |
| Halobacteroides halobius               | 5150    | 5                   | 2649255                         | 1722015750                                | 22,9                              | 13,3                                | 66,5           | 0,015          | 0,7        | 1,0              |
| Myxococcus stipitatus                  | 14675   | 3                   | 10350586                        | 6727880900                                | 18,4                              | 2,7                                 | 8,2            | 0,122          | 5,6        | 8,4              |
| Desulfovibrio qiqas                    | 1382    | 1                   | 3693999                         | 2401099350                                | 12,5                              | 5,2                                 | 5,2            | 0,192          | 8,8        | 13,3             |
|                                        |         |                     |                                 |                                           |                                   |                                     | <b>Sum</b>     | <b>Sum</b>     | <b>Sum</b> |                  |
|                                        |         |                     |                                 |                                           |                                   |                                     | 2,2            | 100,0          | 150,0      |                  |
